# Supplementary material for: TRPV2-spike protein interaction mediates the entry of SARS-CoV-2 into macrophages in febrile conditions
Source: PubMed Central journal article supplement (PMC8210595; doi:10.7150/thno.58781), 2021-05-25
Supplement: thnov11p7379s1.pdf [file thnov11p7379s1.pdf]

## **TRPV2–spike protein interaction mediates the entry of SARS-CoV-2 into macrophages in febrile conditions**

- Jinrui Xu<sup>1,2\*</sup>, Yuquan Yang<sup>3\*</sup>, Zhaoyuan Hou<sup>3#</sup>, Hao Jia<sup>3#</sup>, Yujiong Wang<sup>1,2#</sup>
- <sup>1</sup> Key Laboratory of the Ministry of Education for Conservation and Utilization of Special Biological Resources in the Western, Yinchuan 750021, China
- <sup>2</sup> College of Life Science, Ningxia University, Yinchuan 750021, Ningxia, China
- <sup>3</sup> Faculty of Basic Medicine, Shanghai Jiao tong University School of Medicine, Shanghai, China
- \*: These authors contributed equally to this paper
- #: Corresponding authors

## Figure.S1

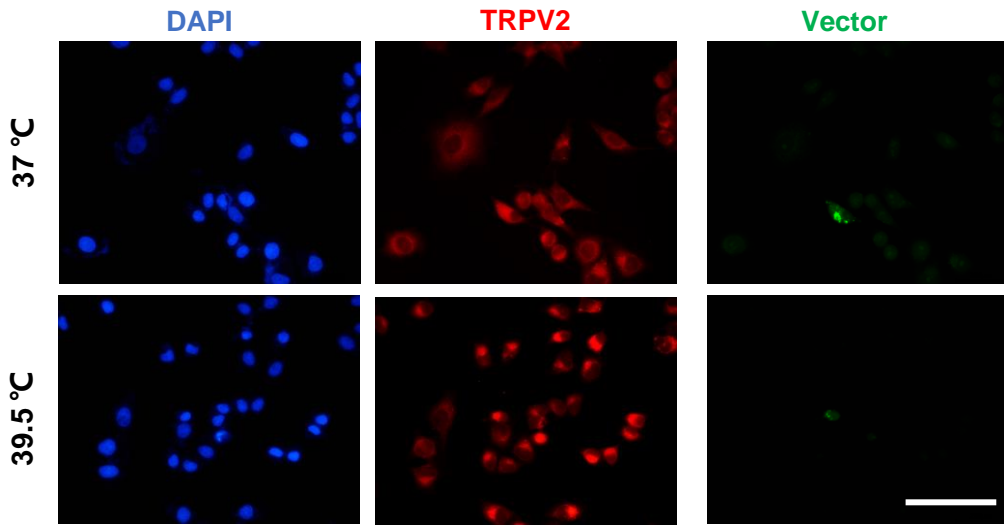

IF performed with primary anti-TRPV2 and anti-His antibodies.  
DAPI: nuclear staining. Scale bars represent 20  $\mu\text{m}$ .

**Figure.S2**

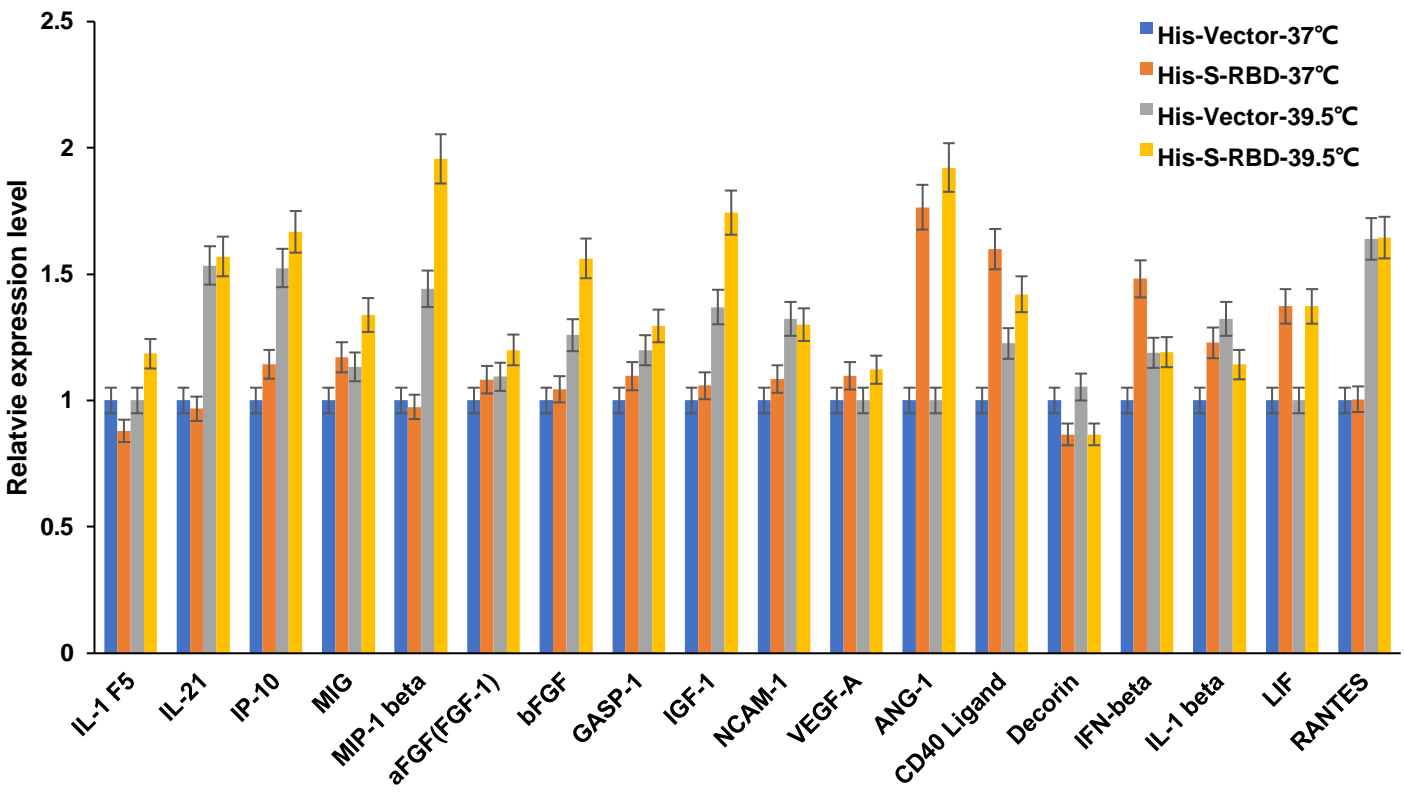

The cytokines amount for IL-1 F5, IL-21, IP-10, MIG, etc. were not significantly affected in His-S-RBD treatment group under 39.5 °C vs control group.

# Figure.S3

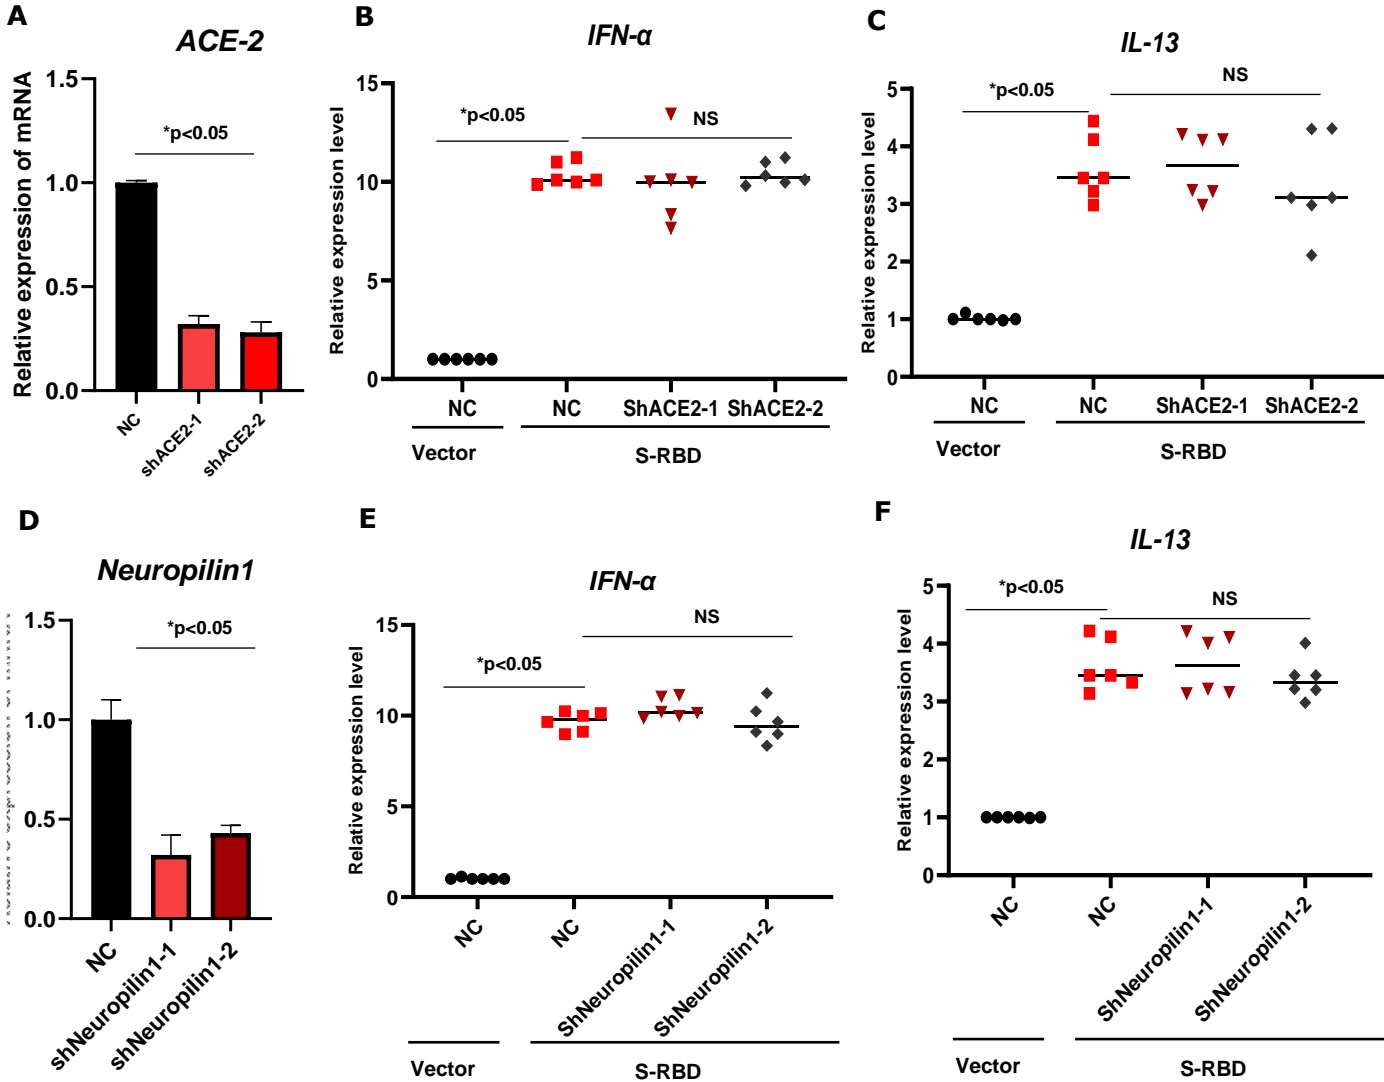

(A) Depletion of ACE-2 in PBAMs using specific shRNAs was performed via lenti-virus transfection. Data are shown as the mean  $\pm$  SD from three independent experiments. \*p < 0.05.

(B) (C) Compared with the control group, the His-S-RBD treatment group has a significant effect on IFN- $\alpha$ (B), IL-13(C) when the temperature is at 39.5 °C. In the ShACE2-1 and -2 groups, there was no significant difference between the S-RBD treatment and the NC group. Data are shown as the mean  $\pm$  SD from six independent experiments. \*p < 0.05.

(D) Depletion of Neuropilin1 in PBAMs using specific shRNAs was performed via lenti-virus transfection. Data are shown as the mean  $\pm$  SD from three independent experiments. \*p < 0.05. NS: no significant.

(E) (F) Compared with the control group, the His-S-RBD treatment group has a significant effect on IFN- $\alpha$ (E), IL-13(F) when the temperature is at 39.5 °C. In the ShNeuropilin-1 and -2 groups, there was no significant difference between the S-RBD treatment and the NC group. Data are shown as the mean  $\pm$  SD from six independent experiments. \*p < 0.05.

## Figure.S4

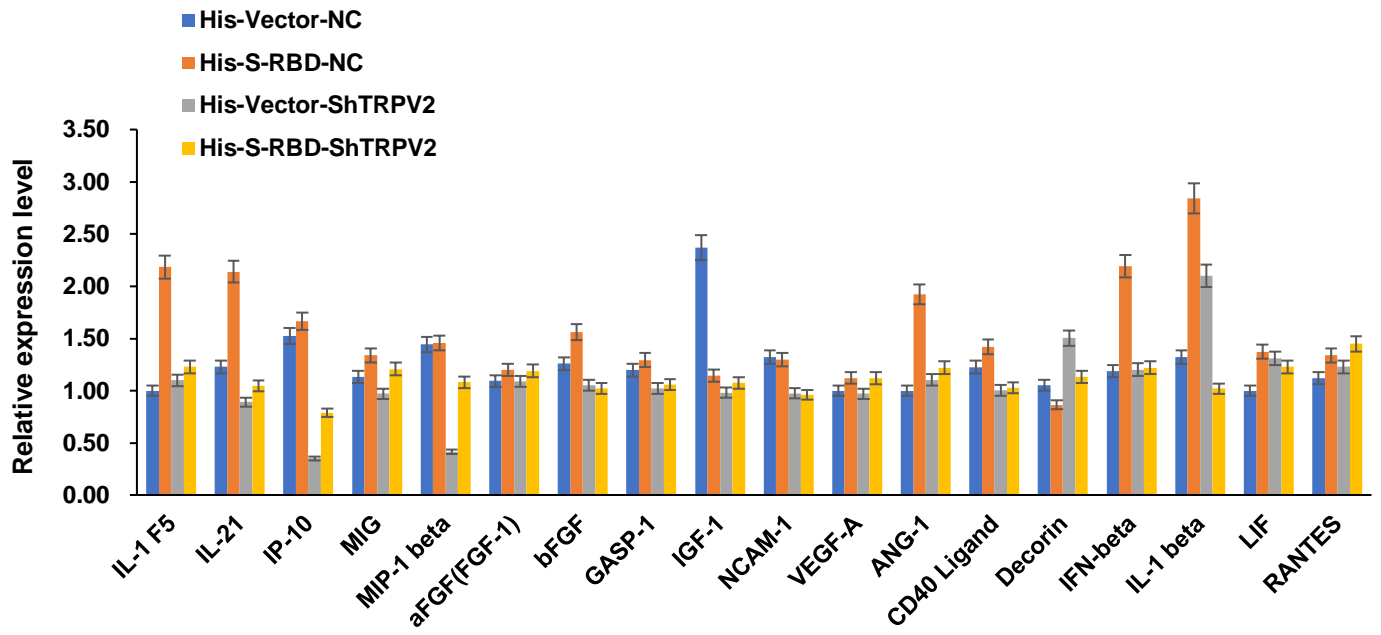

The cytokines amount for IL-1 F5, IL-21, IP-10, MIG, etc. were not significantly affected in His-S-RBD-shTRPV2 vs control group under 39.5 °C.

# Figure.S5

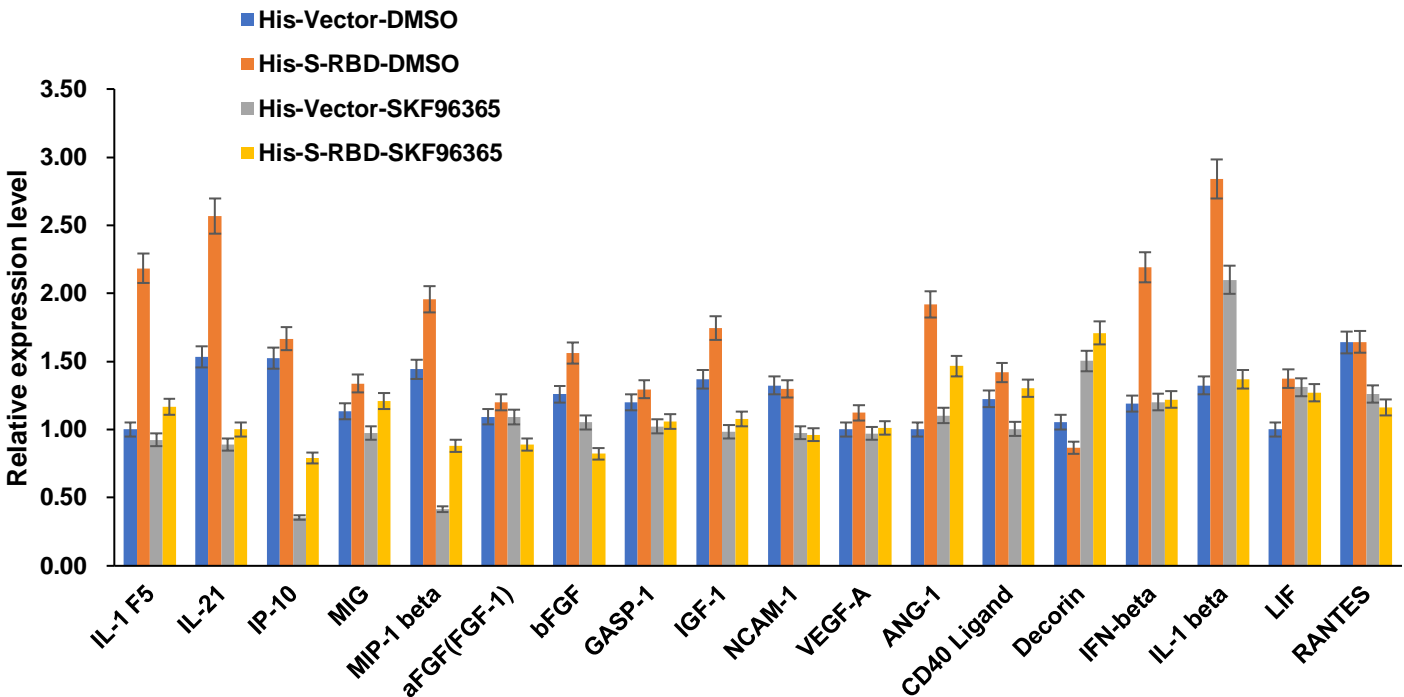

The cytokines amount for IL-1 F5, IL-21, IP-10, MIG, etc. were not significantly affected in His-S-RBD-SKF96365 vs control group under 39.5 °C.
